# Supplementary material for: Docosahexaenoic Acid Esters of Hydroxy Fatty Acid Is a Novel Activator of NRF2
Source: MDPI journal article supplement (doi:10.3390/ijms22147598), 2021-07-15

**Table S1:** The list of significantly altered lipids with >5 folds change.

| Lipid          | FC       | log2(FC) | raw.pval | LOG10(p) |
|----------------|----------|----------|----------|----------|
| FA 22:6        | 26.241   | 4.7137   | 1.65E-08 | 7.7812   |
| PG (22:6/22:6) | 8.9811   | 3.1669   | 3.22E-07 | 6.4926   |
| TAG (56:8)     | 158.79   | 7.3109   | 3.67E-07 | 6.435    |
| TAG (58:8)     | 156.16   | 7.2869   | 4.94E-07 | 6.3063   |
| TAG (58:9)     | 635.42   | 9.3116   | 5.00E-07 | 6.3009   |
| TAG (58:10)    | 1387.1   | 10.438   | 5.56E-07 | 6.2549   |
| PG (18:1/18:1) | 0.059104 | -4.0806  | 6.51E-07 | 6.1862   |
| PG (18:1/22:6) | 0.059127 | -4.08    | 6.67E-07 | 6.1762   |
| TAG (60:12)    | 1811.4   | 10.823   | 9.07E-07 | 6.0425   |
| TAG (56:7)     | 88.974   | 6.4753   | 1.28E-06 | 5.8912   |
| TAG (62:13)    | 1959.5   | 10.936   | 1.44E-06 | 5.8414   |
| TAG (62:14)    | 2415     | 11.238   | 1.67E-06 | 5.7775   |
| TAG (60:13)    | 2807     | 11.455   | 2.15E-06 | 5.6667   |
| TAG (54:6)     | 40.752   | 5.3488   | 3.10E-06 | 5.5085   |
| TAG (66:18)    | 2629.9   | 11.361   | 5.82E-06 | 5.235    |
| TAG (54:4)     | 14.244   | 3.8323   | 1.21E-05 | 4.9175   |
| TAG (62:12)    | 1320.6   | 10.367   | 1.60E-05 | 4.7961   |
| TAG (56:16)    | 6789.1   | 12.729   | 2.44E-05 | 4.6125   |
| TAG (56:6)     | 40.322   | 5.3335   | 2.50E-05 | 4.6028   |
| TAG (58:7)     | 95.44    | 6.5765   | 4.72E-05 | 4.3264   |
| TAG (62:15)    | 52887    | 15.691   | 5.64E-05 | 4.2491   |
| TAG (60:8)     | 246.71   | 7.9467   | 5.74E-05 | 4.2413   |
| CL (68:2)      | 46.307   | 5.5332   | 9.18E-05 | 4.0374   |
| 12DHAHOA       | 22387    | 14.45    | 9.98E-05 | 4.0009   |
| CL (64:0)      | 29.952   | 4.9046   | 0.000101 | 3.9976   |
| TAG (64:17)    | 85901    | 16.39    | 0.000113 | 3.9474   |
| TAG (52:2)     | 6.0159   | 2.5888   | 0.000153 | 3.8147   |
| TAG (58:6)     | 40.42    | 5.337    | 0.000162 | 3.7909   |
| CL (76:12)     | 358.71   | 8.4867   | 0.000184 | 3.7361   |
| TAG (54:3)     | 7.5426   | 2.9151   | 0.00021  | 3.6777   |
| TAG (60:7)     | 60.754   | 5.9249   | 0.00024  | 3.6194   |
| TAG (58:13)    | 103200   | 16.655   | 0.000324 | 3.4896   |
| TAG (62:8)     | 326.68   | 8.3517   | 0.000327 | 3.4857   |
| TAG (53:2)     | 8.2242   | 3.0399   | 0.000434 | 3.3628   |
| TAG (52:1)     | 9.9042   | 3.308    | 0.000454 | 3.3428   |
| TAG (56:12)    | 31812    | 14.957   | 0.000457 | 3.3406   |
| TAG (55:3)     | 7.7314   | 2.9507   | 0.000585 | 3.233    |
| TAG (54:2)     | 9.3769   | 3.2291   | 0.000585 | 3.233    |
| TAG (62:7)     | 113.2    | 6.8227   | 0.000648 | 3.1887   |
| TAG (64:8)     | 594.63   | 9.2158   | 0.000695 | 3.1583   |
| TAG (56:3)     | 7.866    | 2.9756   | 0.000954 | 3.0206   |
| TAG (54:1)     | 9.2226   | 3.2052   | 0.00102  | 2.9915   |
| TAG (58:2)     | 10.901   | 3.4463   | 0.001313 | 2.8817   |
| TAG (56:2)     | 8.1229   | 3.022    | 0.00144  | 2.8416   |
| TAG (60:3)     | 10.615   | 3.408    | 0.001455 | 2.8371   |
| TAG (58:3)     | 8.8447   | 3.1448   | 0.001643 | 2.7844   |

**Table S2:** The list of lipid metabolites with their loading scores corresponds to OPLSDA plot.

| Lipid           | p[1]      | p(corr)[1] | Lipid          | p[1]      | p(corr)[1] |
|-----------------|-----------|------------|----------------|-----------|------------|
| PG (18:1/18:1)  | 22.67     | 0.99       | TAG (52:1)     | -6558.30  | -0.91      |
| PG (18:1/22:6)  | 22.66     | 0.99       | TAG (56:12)    | -3714.80  | -0.91      |
| PE (18:1/22:5)  | 49.73     | 0.97       | TAG (53:2)     | -1136.60  | -0.91      |
| PI (18:0/20:2)  | 31.64     | 0.97       | 12-DHAHOA      | -121.46   | -0.92      |
| PI (18:1/20:4)  | 53.15     | 0.96       | TAG (62:8)     | -3178.00  | -0.92      |
| PE (16:0/20:4)  | 57.35     | 0.95       | TAG (58:13)    | -2205.40  | -0.92      |
| PE (16:0/18:1)  | 39.42     | 0.95       | TAG (60:7)     | -5222.10  | -0.92      |
| PI (16:1/18:1)  | 8.42      | 0.95       | TAG (54:3)     | -10409.00 | -0.93      |
| PE (18:1/20:4)  | 173.39    | 0.94       | PE (18:1/22:6) | -176.55   | -0.93      |
| PI (18:0/18:1)  | 19.56     | 0.94       | TAG (58:6)     | -3730.80  | -0.93      |
| PI (16:0/20:4)  | 15.87     | 0.94       | TAG (52:2)     | -9051.80  | -0.93      |
| PI (18:0/22:4)  | 8.58      | 0.94       | TAG (50:1)     | -3010.40  | -0.93      |
| PE (18:0/20:4)  | 255.58    | 0.93       | FA 18:3        | -5.67     | -0.93      |
| PS (18:0/22:5)  | 34.25     | 0.91       | TAG (64:17)    | -2642.40  | -0.94      |
| PE (16:1/18:1)  | 40.00     | 0.91       | TAG (62:15)    | -5834.10  | -0.95      |
| PE (18:0/20:3)  | 13.36     | 0.90       | TAG (60:8)     | -5196.20  | -0.95      |
| PE (18:0/18:1)  | 32.96     | 0.90       | TAG (58:7)     | -11198.00 | -0.95      |
| LPE-N (FA 18:1) | 163.06    | 0.88       | TAG (56:16)    | -6438.50  | -0.96      |
| FA 18:1         | 79.47     | 0.82       | TAG (56:6)     | -6033.40  | -0.96      |
| PS (18:0/18:1)  | 47.91     | 0.82       | TAG (62:12)    | -3059.20  | -0.96      |
| FA 16:0         | 1633.10   | 0.75       | PE (18:0/22:6) | -486.96   | -0.96      |
| TAG (58:3)      | -2225.20  | -0.87      | TAG (52:3)     | -1646.90  | -0.96      |
| TAG (56:2)      | -2985.80  | -0.88      | TAG (66:18)    | -7590.00  | -0.97      |
| TAG (60:3)      | -1683.90  | -0.88      | TAG (54:6)     | -2263.30  | -0.97      |
| TAG (58:2)      | -1724.00  | -0.88      | TAG (54:4)     | -2937.00  | -0.97      |
| CL (76:12)      | -10.27    | -0.89      | TAG (62:14)    | -8182.50  | -0.97      |
| TAG (54:1)      | -1971.30  | -0.89      | TAG (60:13)    | -3054.30  | -0.97      |
| TAG (56:3)      | -5710.50  | -0.89      | TAG (62:13)    | -5777.90  | -0.97      |
| PE (16:0/22:6)  | -162.36   | -0.90      | TAG (60:12)    | -5228.20  | -0.98      |
| FA 18:2         | -37.70    | -0.90      |                |           |            |
| CL (64:0)       | -14.84    | -0.90      |                |           |            |
| TAG (64:8)      | -3068.20  | -0.90      |                |           |            |
| CL (68:2)       | -21.16    | -0.90      |                |           |            |
| TAG (62:7)      | -3419.80  | -0.90      |                |           |            |
| TAG (54:2)      | -10743.00 | -0.90      |                |           |            |
| TAG (55:3)      | -809.39   | -0.90      |                |           |            |

**Figure S1:** Reporter gene assay results of DHA. \*  $p < 0.05$ , \*\*  $p < 0.01$ , \*\*\*  $p < 0.001$ , ns: not significant (one-way ANOVA) ( $n = 6$ ).

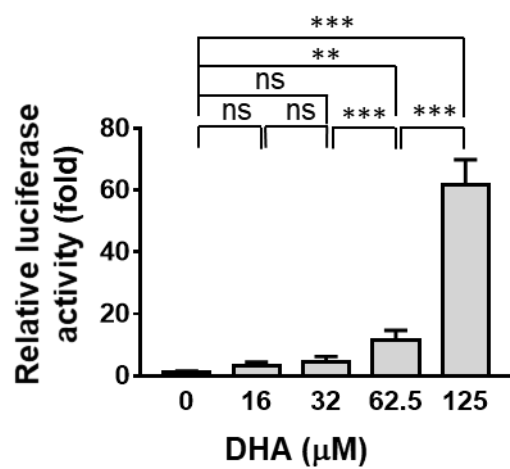

Supplement: s1 [file s1]
